# Supplementary material for: Wax based oleogels and their application in sponge cakes
Source: Royal Society of Chemistry journal article supplement (doi:10.1039/d2fo00563h), 2022-01-01
Supplement: d2fo00563h1.pdf [file d2fo00563h1.pdf]

1 Supplemental information

2 *S 1 Fitting parameters of the oil-leaping experiments obtained by using a Michaelis-Menten equation. Lmax corresponds to the calculated*  
3 *maximum leaping of the system and Lc the leaping constant.*

| Wax dosage     | 0% w/w |       | 1% w/w |      | 5% w/w |       | 10% w/w |       |
|----------------|--------|-------|--------|------|--------|-------|---------|-------|
| Parameters     | Lmax   | Lc    | Lmax   | Lc   | Lmax   | Lc    | Lmax    | Lc    |
| <b>Canola</b>  | 10.9   | 201.8 |        |      |        |       |         |       |
| <b>SFW</b>     |        |       | 4.5    | 52.6 | 15.8   | 515.9 | 12.2    | 255.3 |
| <b>RBW</b>     |        |       |        |      | 8.2    | 130.8 | 9.7     | 234.3 |
| <b>BW</b>      |        |       |        |      | 9.1    | 159.0 | 10.4    | 774.1 |
| <b>BW:SFWh</b> |        |       |        |      | 13.1   | 266.0 | 11.7    | 377.6 |

4  
5
